# Supplementary material
Source: ML conference proceedings conference paper supplement (https://openreview.net/forum?id=TXq8PCRSoY)
Supplement: supplementary_material [file attachment]

There are 2 LICENSE files in this document. The one in the “Python” folder belongs to Yueqi Wang whose code was insightful for us. The GitHub page related to his work is also cited in the code. The main LICENSE file for this work will be completed after the revision results.
